# Supplementary material for: A Novel Multi-Strain E3 Probiotic Formula Improved the Gastrointestinal Symptoms and Quality of Life in Chinese Psoriasis Patients
Source: MDPI journal article supplement (doi:10.3390/microorganisms12010208), 2024-01-19

Supplementary Figure S1

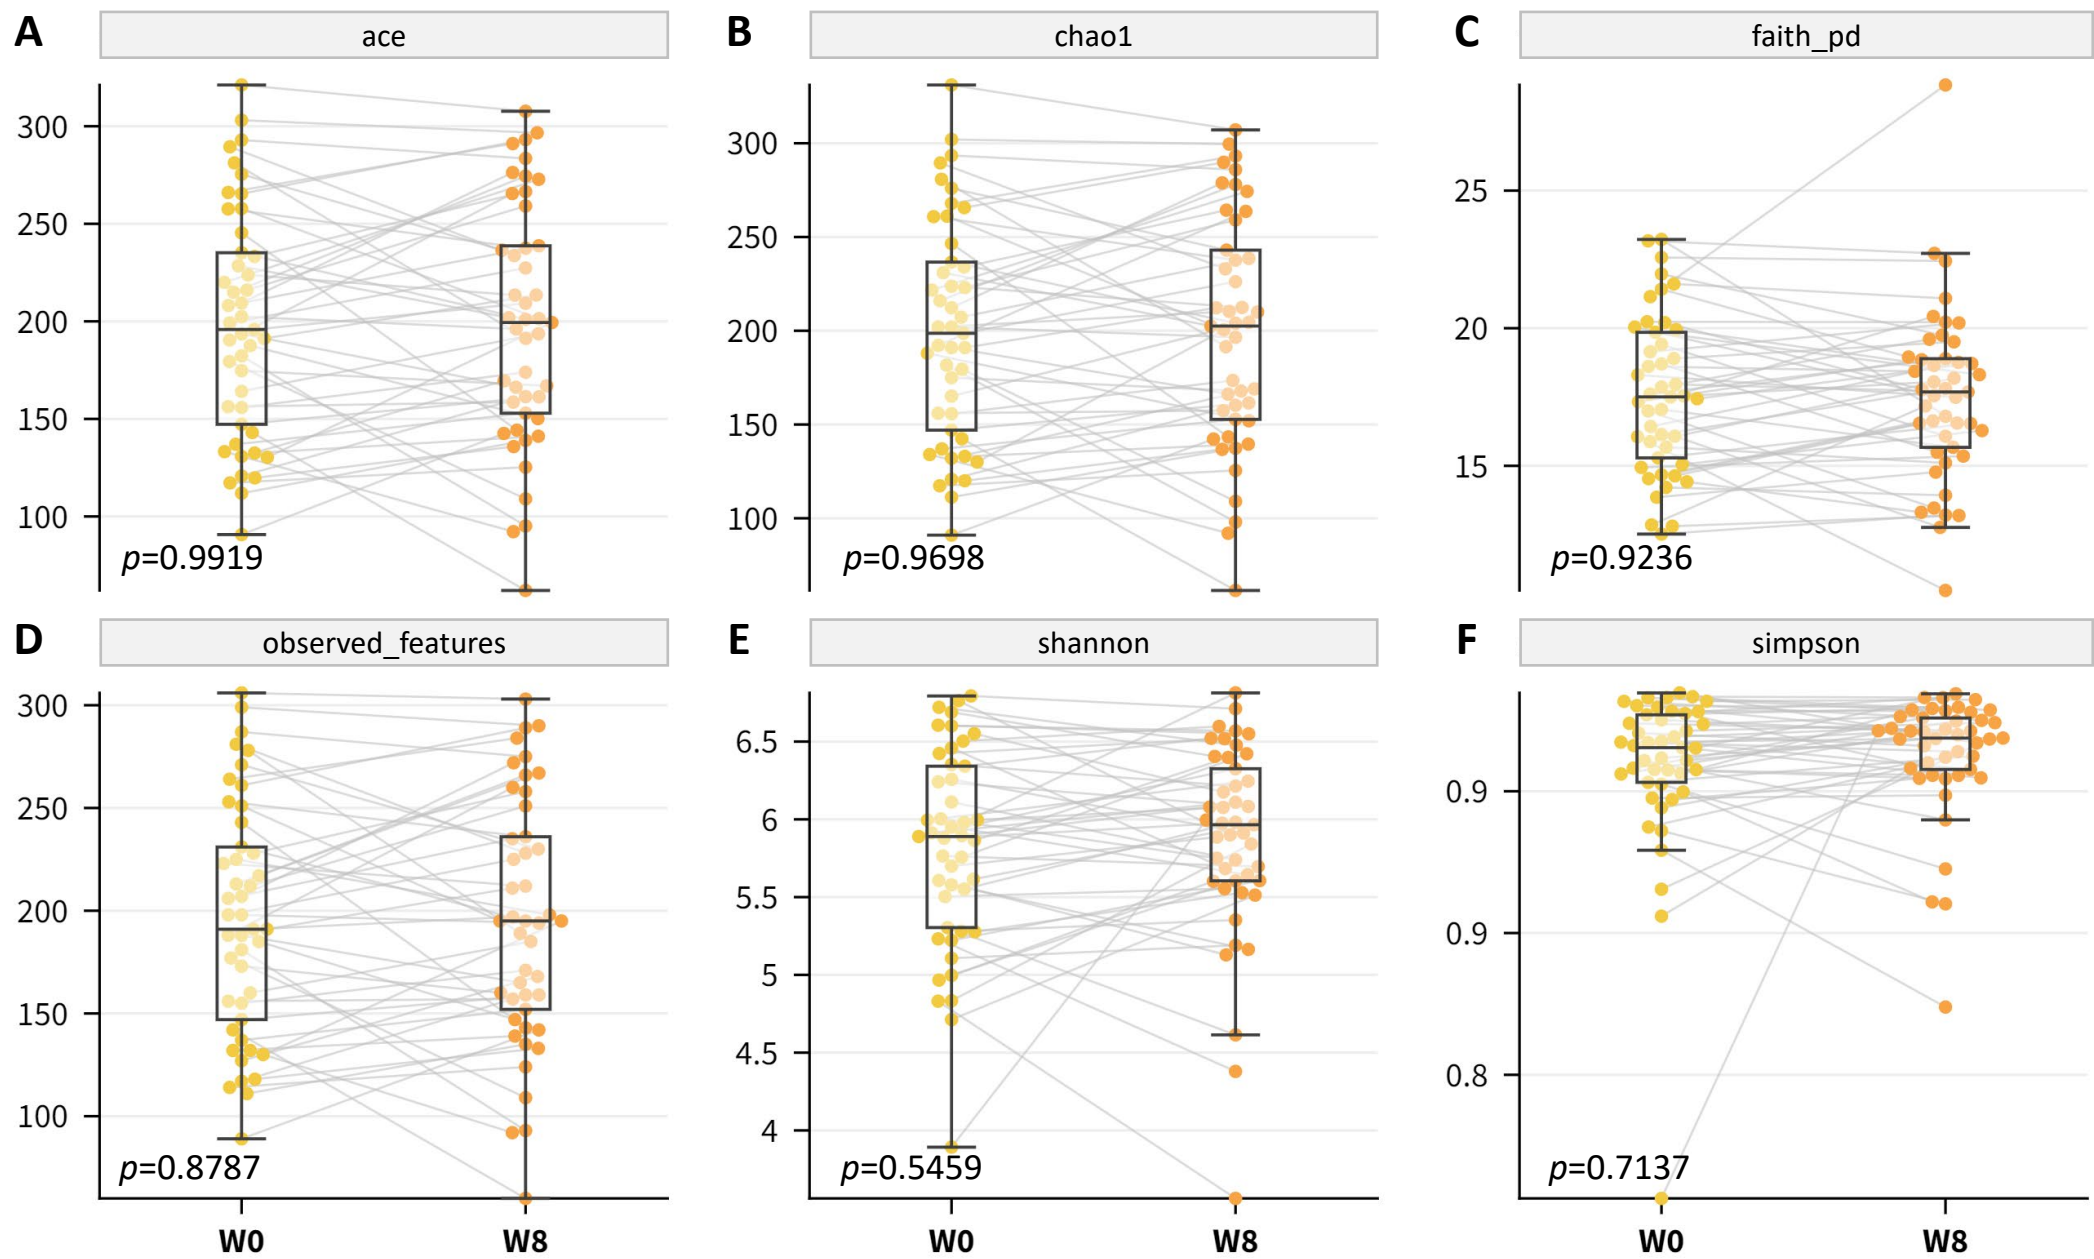

Supplementary Figure S2

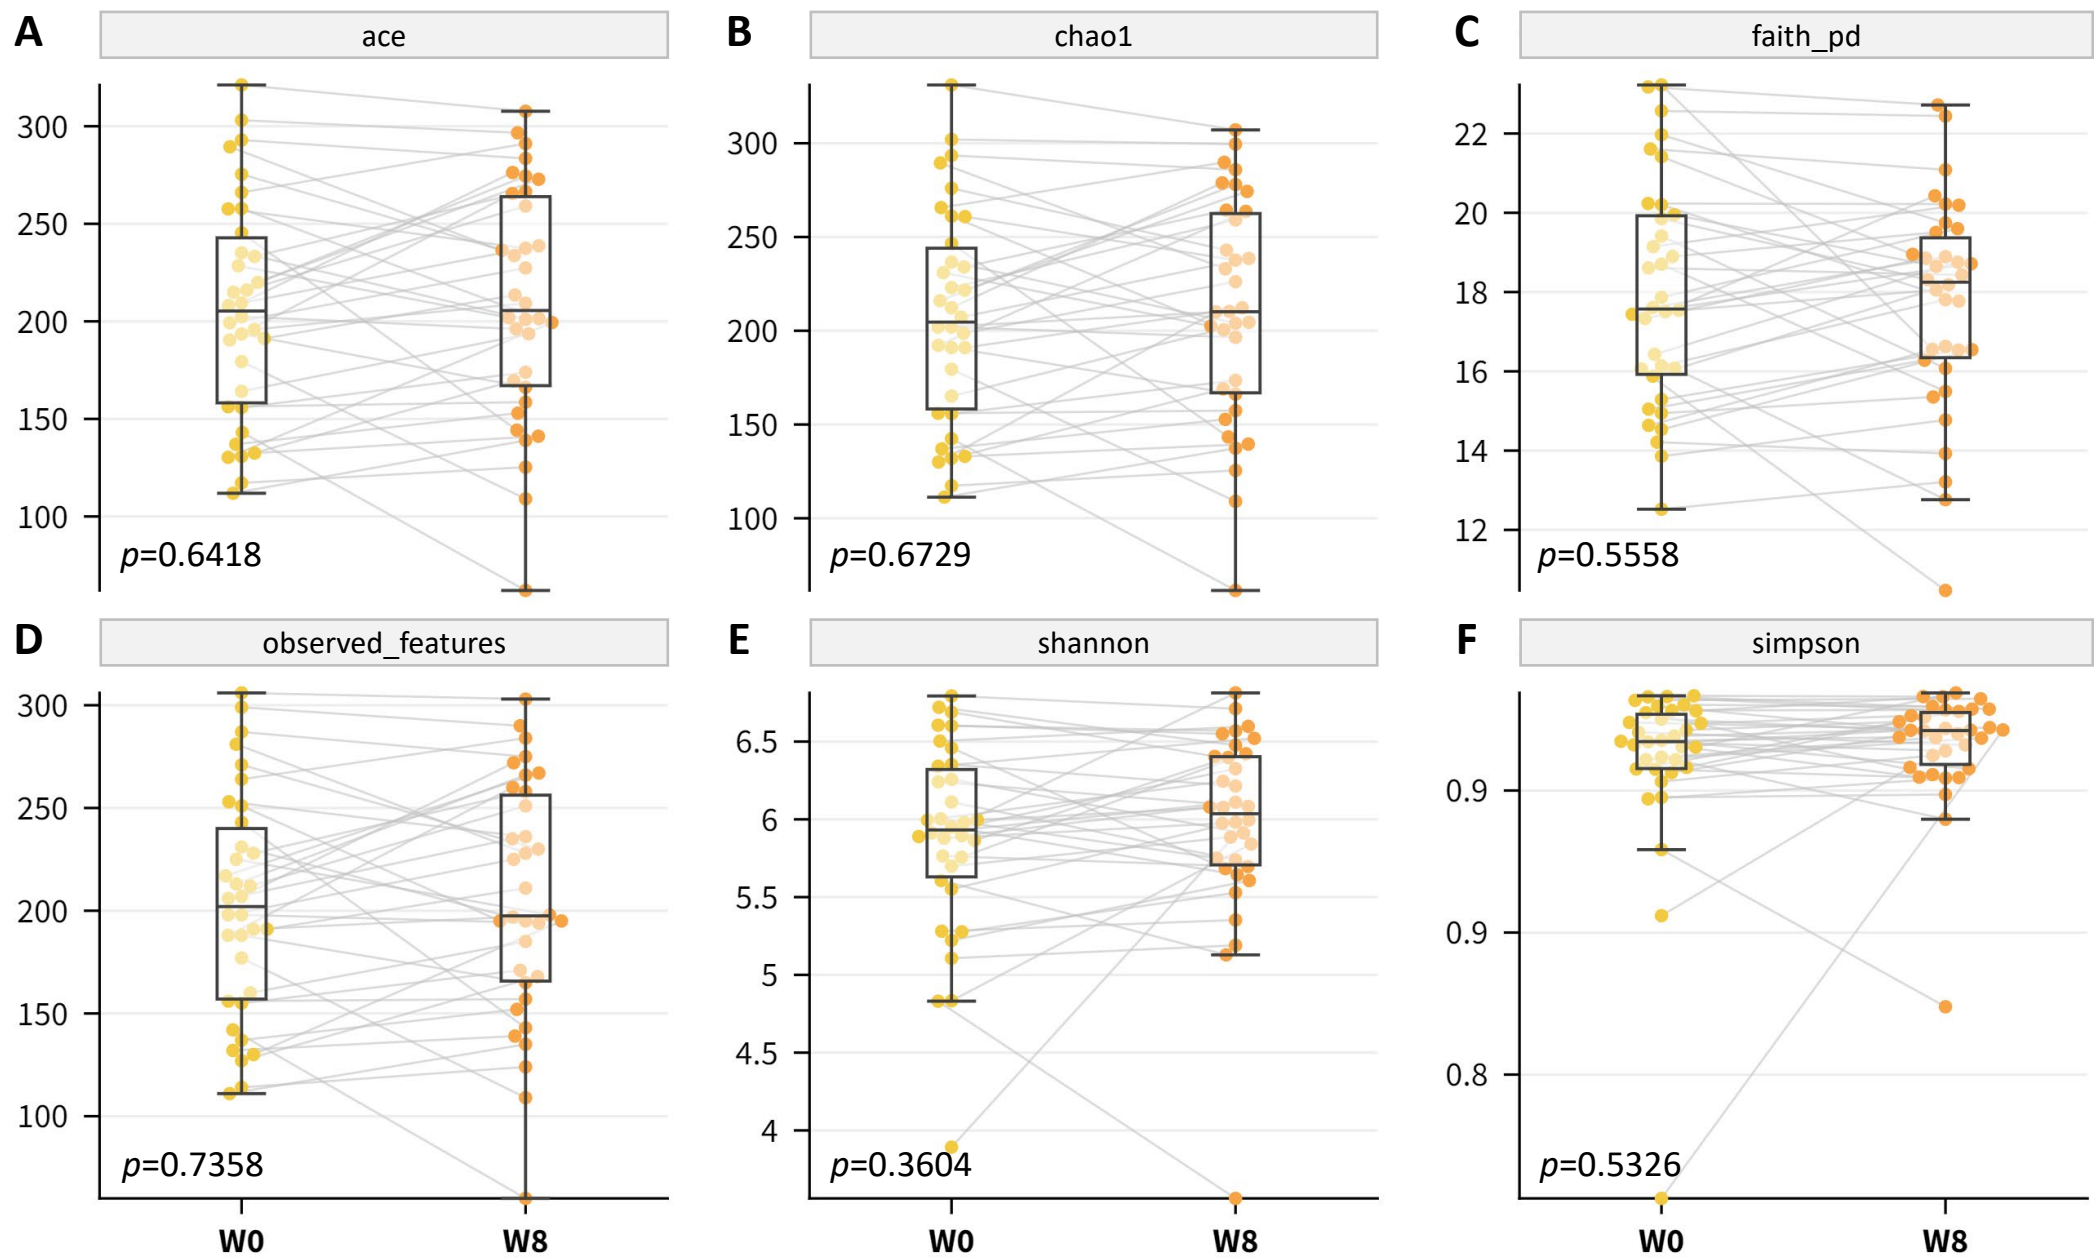

Supplementary Figure S3

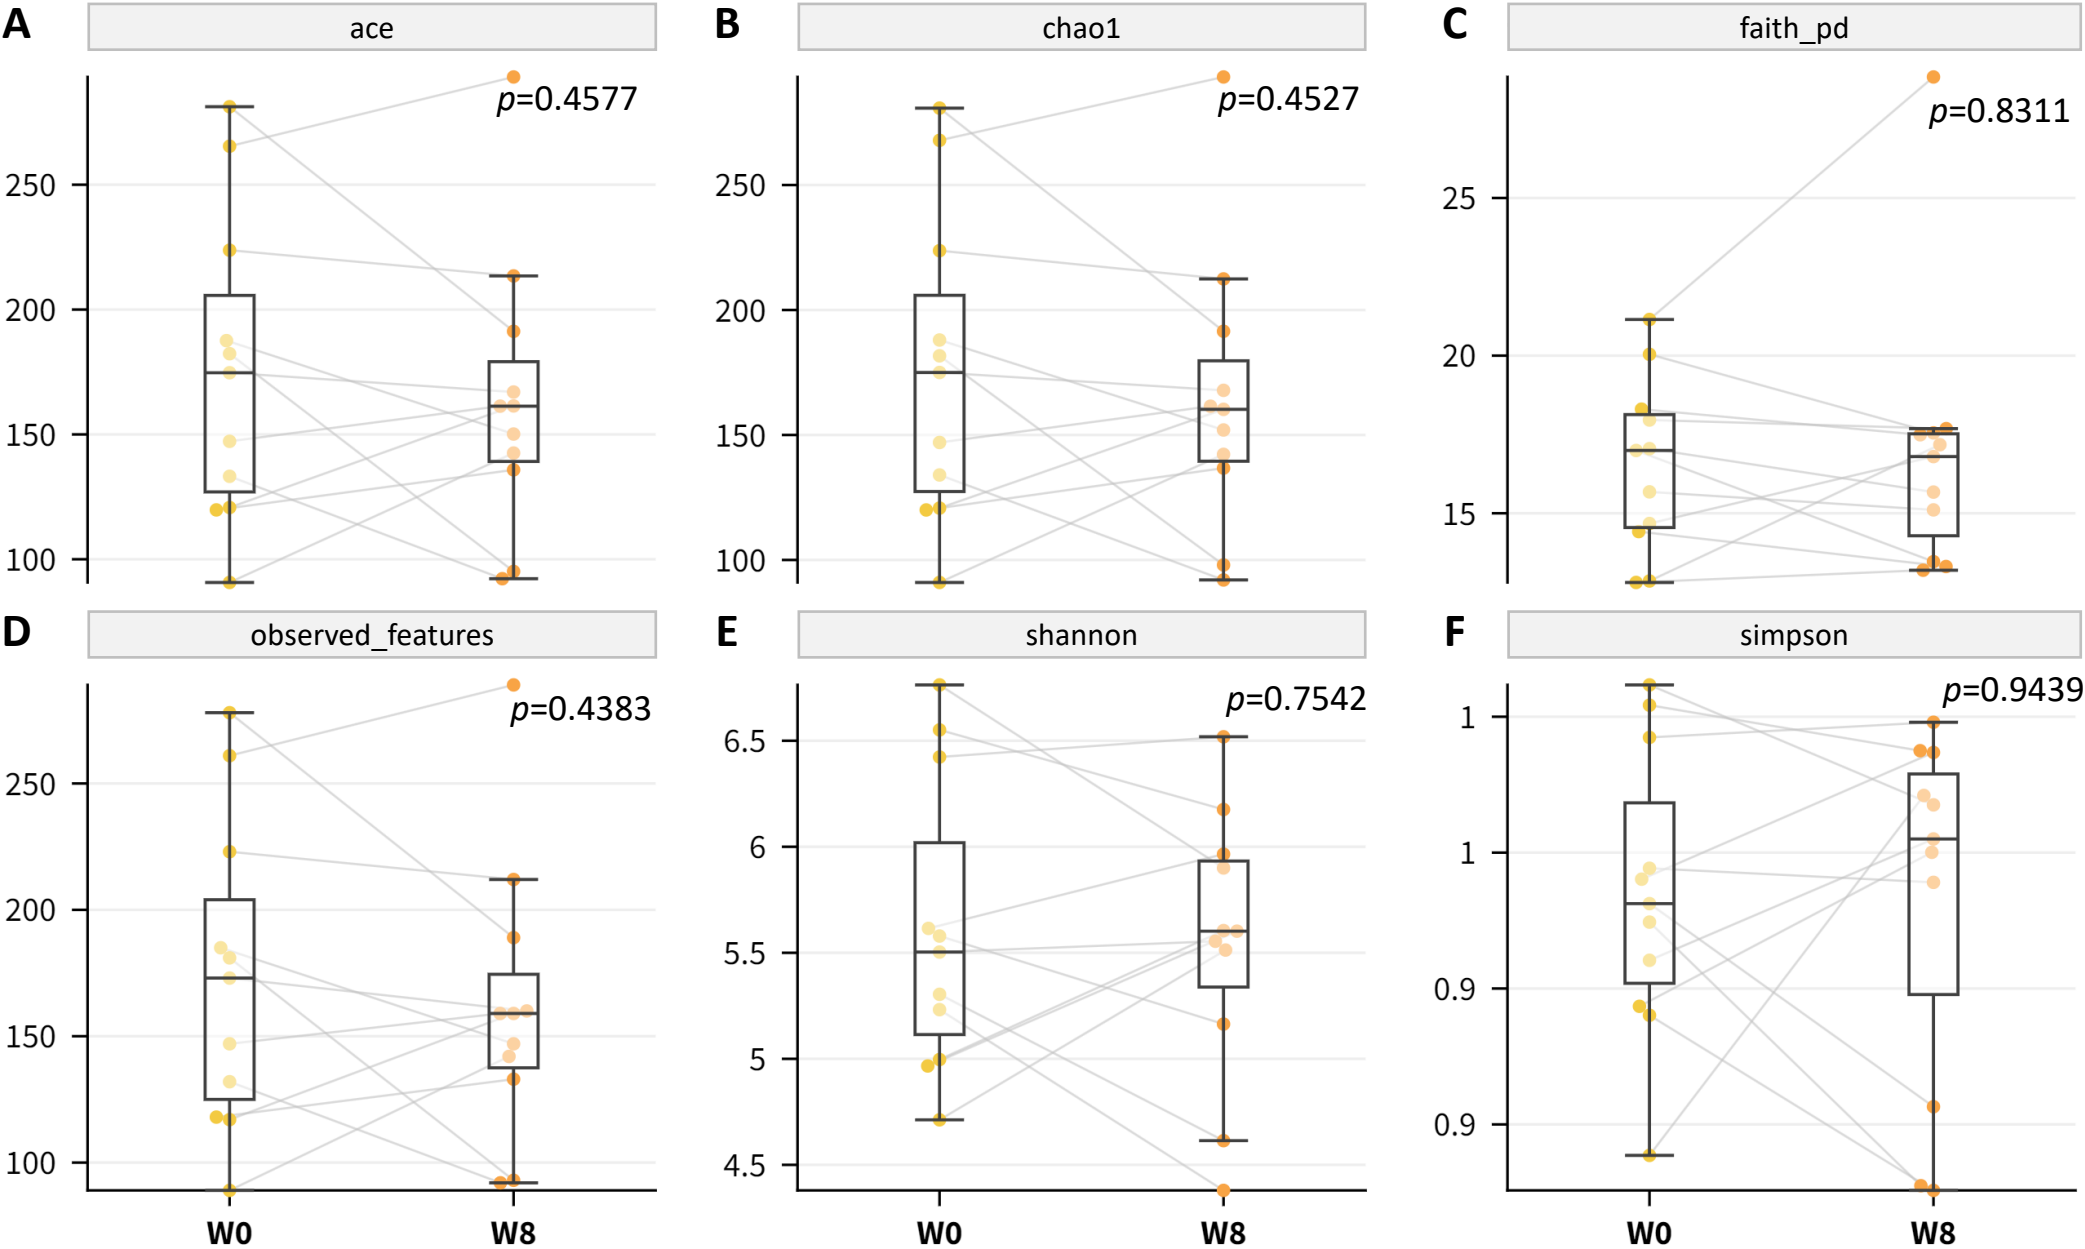

Supplementary Figure S4

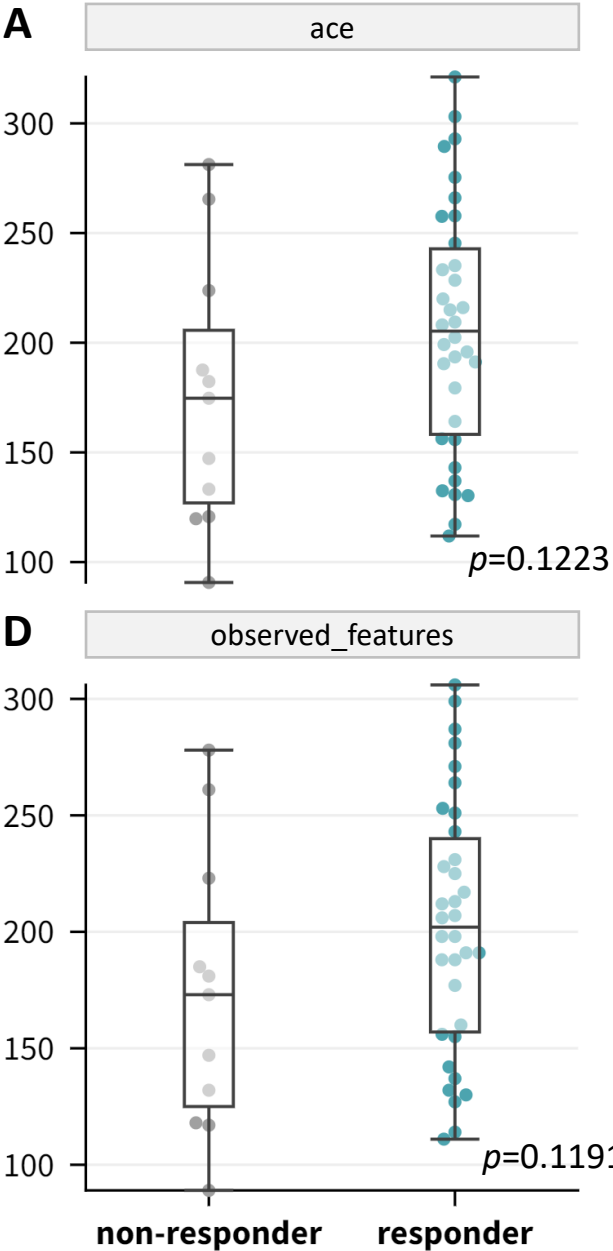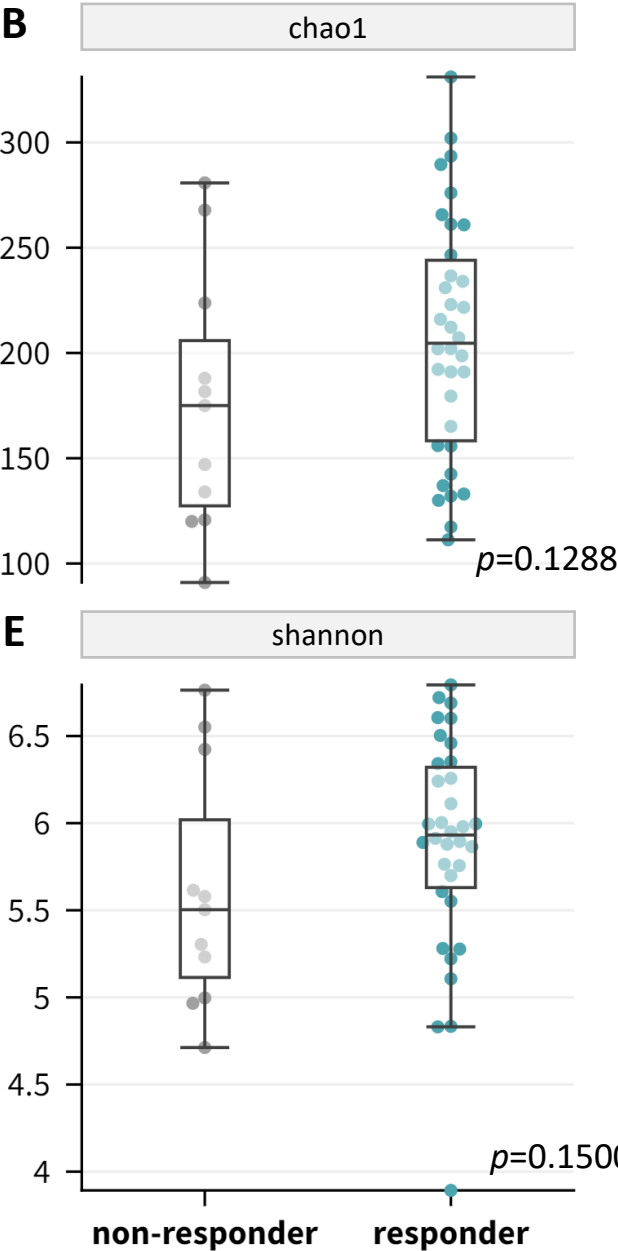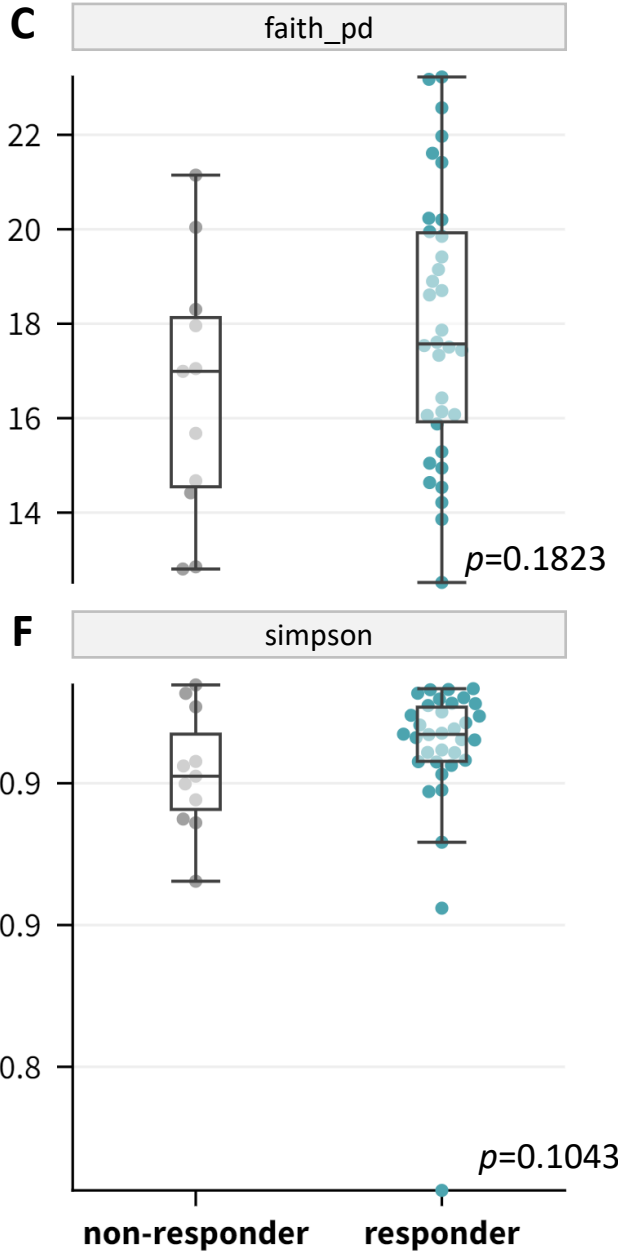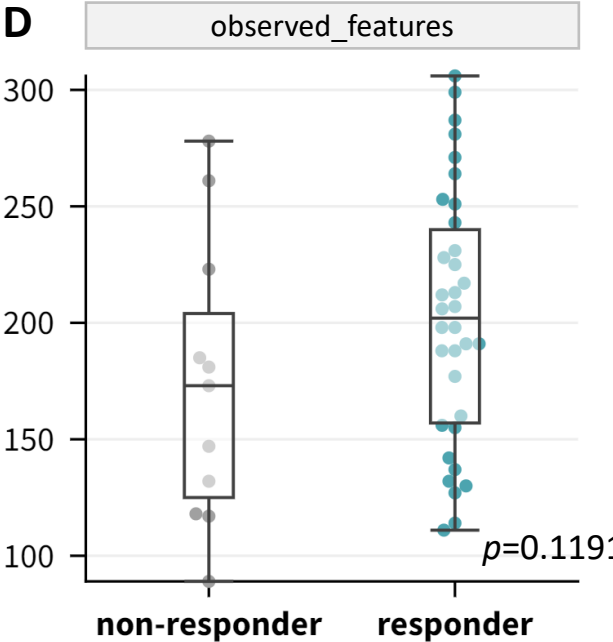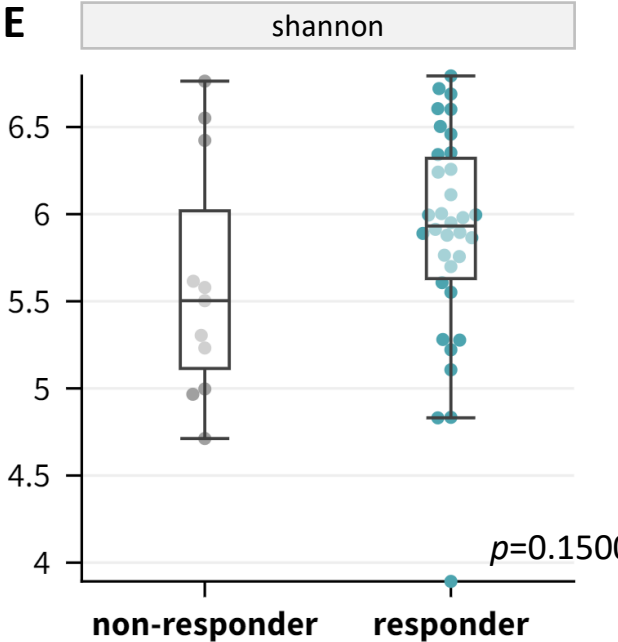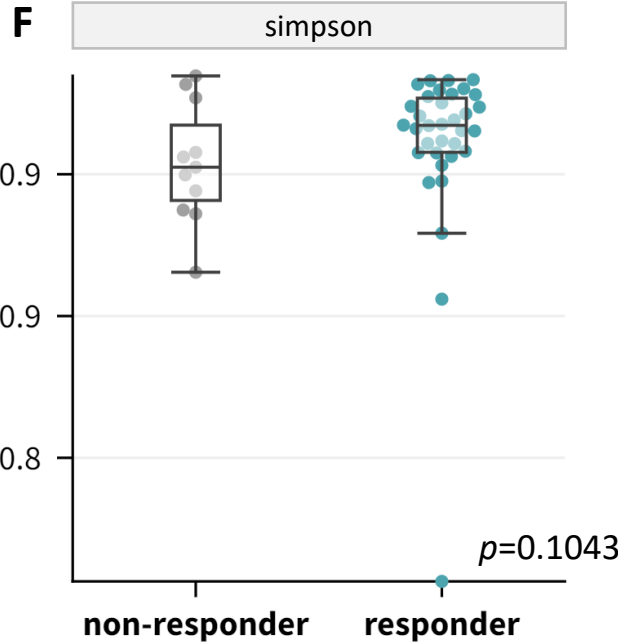

Supplement: s1 [file s1]
